# Supplementary material for: The Global Ecology and Epidemiology of West Nile Virus
Source: Hindawi journal article supplement (doi:10.1155/2015/376230), 2015-01-01
Supplement: f1 [file 376230.f1.pdf]

Supplemental table 1.

| <b>Country or Territory</b>   | <b>WNV reports</b> | <b>Reference</b> |
|-------------------------------|--------------------|------------------|
| Albania                       | Human              | (226)            |
| Algeria                       | Human              | (165)            |
| Angola                        | Human              | (318)            |
| Argentina                     | Human              | (17)             |
| Armenia                       | Non-human          | (319)            |
| Australia                     | Human              | (219)            |
| Austria                       | Human              | (250)            |
| Azerbaijan                    | Human              | (320)            |
| Bahamas                       | Human              | (288)            |
| Belarus                       | Human              | (321)            |
| Belize                        | Non-human          | (289)            |
| Bolivia                       | Non-human          | (322)            |
| Bosnia and Herzegovina        | Human              | (165)            |
| Botswana                      | Human              | (323)            |
| Brazil                        | Non-human          | (309)            |
| Bulgaria                      | Non-human          | (324)            |
| Burma (Myanmar)               | Human              | (200)            |
| Cambodia                      | Human              | (88)             |
| Cameroon                      | Human              | (325)            |
| Canada                        | Human              | (280)            |
| Cayman Islands (UK)           | Human              | (283)            |
| Central African Republic      | Human              | (326)            |
| Chad                          | Non-human          | (181)            |
| China                         | Human              | (214)            |
| Colombia                      | Non-human          | (305)            |
| Congo                         | Non-human          | (182)            |
| Congo, Democratic Republic of | Human              | (327)            |
| Costa Rica                    | Non-human          | (328)            |
| Croatia                       | Human              | (251)            |
| Cuba                          | Human              | (290)            |
| Cyprus                        | Non-human          | (210)            |
| Czech Republic                | Human              | (255)            |
| Djibouti                      | Human              | (197)            |
| Dominican Republic            | Non-human          | (285)            |
| Egypt                         | Human              | (160)            |
| El Salvador                   | Non-human          | (301)            |
| Ethiopia                      | Human              | (329)            |
| Finland                       | --*                | (330)            |
| France                        | Human              | (9)              |
| Gabon                         | Human              | (194)            |

|                     |           |       |
|---------------------|-----------|-------|
| Gambia              | Human     | (331) |
| Germany             | Non-human | (264) |
| Ghana               | Human     | (332) |
| Greece              | Human     | (262) |
| Guadeloupe          | Non-human | (287) |
| Guatemala           | Non-human | (302) |
| Guinea              | Human     | (192) |
| <u>Haiti</u>        | Human     | (294) |
| <u>Hungary</u>      | Human     | (234) |
| <u>India</u>        | Human     | (3)   |
| <u>Indonesia</u>    | Human     | (333) |
| <u>Iran</u>         | Human     | (174) |
| <u>Israel</u>       | Human     | (2)   |
| <u>Italy</u>        | Human     | (241) |
| <u>Ivory Coast</u>  | Non-human | (334) |
| <u>Jamaica</u>      | Non-human | (335) |
| <u>Japan</u>        | --*       | (336) |
| <u>Jordan</u>       | Human     | (177) |
| <u>Kenya</u>        | Human     | (327) |
| <u>Korea, South</u> | --*       | (218) |
| Kosovo              | Human     | (165) |
| Lebanon             | Human     | (179) |
| Macedonia           | Human     | (337) |
| Madagascar          | Human     | (191) |
| Malaysia            | Human     | (211) |
| Mauritania          | Non-human | (338) |
| Mauritius           | Human     | (339) |
| Mexico              | Human     | (296) |
| Montenegro          | Human     | (188) |
| Morocco             | Human     | (186) |
| Namibia             | Human     | (340) |
| Nepal               | Human     | (213) |
| Nicaragua           | Human     | (18)  |
| Nigeria             | Human     | (158) |
| Pakistan            | Human     | (341) |
| Philippines         | Human     | (210) |
| Poland              | Non-human | (270) |
| Portugal            | Human     | (254) |
| Puerto Rico (US)    | Human     | (342) |
| Romania             | Human     | (15)  |
| Russian Federation  | Human     | (14)  |
| Rwanda              | --**      | (182) |
| Senegal             | Non-human | (181) |

|                     |           |       |
|---------------------|-----------|-------|
| Serbia              | Human     | (252) |
| Slovakia            | Non-human | (229) |
| Somalia             | Human     | (343) |
| South Africa        | Human     | (159) |
| Spain               | Human     | (249) |
| Sri Lanka           | Non-human | (344) |
| Sudan               | Human     | (327) |
| Sweden              | --*       | (345) |
| Tajikistan          | Non-human | (346) |
| Tanzania            | Human     | (347) |
| Thailand            | Human     | (348) |
| Trinidad and Tobago | Non-human | (289) |
| Tunisia             | Human     | (183) |
| Turkey              | Human     | (168) |
| Uganda              | Human     | (10)  |
| Ukraine             | Human     | (232) |
| United Kingdom      | Non-human | (267) |
| United States       | Human     | (133) |
| Uzbekistan          | Human     | (349) |
| Venezuela           | Non-human | (308) |
| Zambia              | Non-human | (182) |

\* In these countries, seropositivity for WNV has been detected only in non-resident birds, which was not considered indicative of local transmission.

\*\* Kading et al reported seropositivity in gorillas living near the border of the Democratic Republic of the Congo and Rwanda, which were sampled in the D.R.C., but may have been infected in Rwanda.
